# Supplementary material
Source: publisher figshare collection journal article supplement (https://future-science-group.figshare.com/ndownloader/files/28533111)
Supplement: Supplementary file 1 [file 28533111]

**E-appendix**

**Supplementary Table 1:** Comparing cancer types of focus among the 15 example studies.

| *Type of Cancer* | *Number of studies using primary data from trials* | *Number of studies using EHR data* | *Number of studies using aggregate data* |
| --- | --- | --- | --- |
| Glioblastoma | 0 | 0 | 1 |
| Biliary tract cancer | 0 | 0 | 1 |
| Non-small cell lung cancer | 2 | 3 | 1 |
| Multiple myeloma | 0 | 1 | 0 |
| GE junction cancer | 0 | 1 | 0 |
| Acute lymphoblastic leukemia | 1 | 0 | 0 |
| Chronic myeloid leukemia | 1 | 0 | 0 |
| Renal cell carcinoma | 1 | 0 | 0 |
| Breast cancer | 0 | 0 | 1 |
| Small cell lung cancer | 0 | 0 | 1 |
